# Supplementary material for: Genetic Attenuation of Paraoxonase 1 Activity Induces Proatherogenic Changes in Plasma Proteomes of Mice and Humans
Source: PubMed Central journal article supplement (PMC7761039; doi:10.3390/antiox9121198), 2020-11-28
Supplement: antioxidants-09-01198-s001.pdf [file antioxidants-09-01198-s001.pdf]

## Supplementary material

Supplementary Table S1.

Supplementary Table S2.

Supplementary Table S1. Characteristics of participants.

| Variable          | All<br>(n=100) | <i>PON1-192QQ</i><br>(n = 51) | <i>PON1-192QR</i><br>(n = 30) | <i>PON1-192RR</i><br>(n = 19) | Annova<br><i>p</i> -value |
|-------------------|----------------|-------------------------------|-------------------------------|-------------------------------|---------------------------|
| Female sex, n (%) | 50 (50)        | 26 (51)                       | 14 (47)                       | 10 (53)                       |                           |
| Age, years        | 48.9±16.8      | 49.7±18.8                     | 49.6±13.8                     | 45.7±14.5                     | 0.654                     |
| Glucose, mM       | 5.7±0.8        | 5.6±0.9                       | 5.8±0.7                       | 5.7±0.82                      | 0.687                     |
| T-C, mg/dl        | 202.5±41.5     | 192.9±36.0                    | 211.0±33.2                    | 214.7±59.9                    | 0.059                     |
| HDL-C, mg/dl      | 63.4±18.3      | 61.2±16.1                     | 68.9±20.7                     | 60.4±19.1                     | 0.139                     |
| LDL-C, mg/dl      | 115.1±37.2     | 109.0±33.2                    | 117.3±35.1                    | 127.9±47.6                    | 0.159                     |
| TG, mg/dl         | 123.4±90.0     | 114.6±87.1                    | 132.4±110.7                   | 132.7±57.8                    | 0.615                     |
| Creatinine, μM    | 73.9±113.0     | 73.1±12.8                     | 74.8±13.1                     | 74.6±13.8                     | 0.825                     |
| e-GFR, ml/min/pc  | 85.6±8.7       | 85.6±9.1                      | 85.5±8.8                      | 85.8±8.2                      | 0.994                     |
| GSH, μM           | 3.9±3.0        | 3.8±3.2                       | 4.2±3.1                       | 3.9±2.6                       | 0.860                     |
| Hcy, μM           | 5.7±2.1        | 5.5±2.1                       | 6.0±2.1                       | 6.0±2.1                       | 0.499                     |
| Cys, μM           | 215.4±67.7     | 217.2±74.5                    | 210.0±63.1                    | 219.1±57.7                    | 0.869                     |
| CysGly, μM        | 18.7±11.7      | 18.2±11.9                     | 19.0±11.9                     | 19.7±11.5                     | 0.884                     |
| POase, units      | 0.011±0.009    | 0.0033±0.0034                 | 0.016±0.002                   | 0.023±0.005                   | 0.000                     |
| PhAcase, units    | 0.455±0.111    | 0.396±0.070                   | 0.546±0.103                   | 0.469±0.113                   | 0.000                     |

T-C, Total cholesterol; HDL-C, high-density lipoprotein cholesterol; LDL-C, low-density lipoprotein cholesterol; TG, triglycerides; e-GFR, estimated glomerular filtration rate; GSH, glutathione; Hcy, homocysteine; Cys, cysteine; CysGly, cysteinylglycine; POase, PON1 activity assayed with paraoxon (Jakubowski, 2000); PhAcase, PON1 activity assayed with phenyl acetate (Jakubowski, 2000).

Supplementary Table S2. *PON1* genotype-responsive proteins in humans and mice.

| Gene Name       | Protein ID | Protein Name                                                            | <i>PON1</i> 192QQ<br><i>vs. RR+QR</i> |                   | <i>PON1</i> 192QQ<br><i>vs. QR</i> |                   | <i>PON1</i> 192QR<br><i>vs. RR</i> |                   | <i>PON1</i> 192QQ<br><i>vs. RR</i> |                   | ANOVA<br><i>p</i> value | MOUSE<br><i>Pon1</i> <sup>-/-</sup> <i>vs.</i> <i>Pon1</i> <sup>+/+</sup> |                   | Molecular Function/Biological<br>Process                                                               |
|-----------------|------------|-------------------------------------------------------------------------|---------------------------------------|-------------------|------------------------------------|-------------------|------------------------------------|-------------------|------------------------------------|-------------------|-------------------------|---------------------------------------------------------------------------|-------------------|--------------------------------------------------------------------------------------------------------|
|                 |            |                                                                         | Fold<br>change                        | <i>p</i><br>value | Fold<br>change                     | <i>p</i><br>value | Fold<br>change                     | <i>p</i><br>value | Fold<br>change                     | <i>p</i><br>value |                         | Fold<br>change                                                            | <i>p</i><br>value |                                                                                                        |
| <i>Afm</i>      | O89020     | Afamin                                                                  |                                       |                   |                                    |                   |                                    |                   |                                    |                   |                         | 0.77                                                                      | 0.008             | Vitamin transport                                                                                      |
| N/A             | Q96SB0     | Anti-streptococcal/anti-<br>myosin Ig λ light chain var.<br>reg. region | 0.81                                  | 0.016             | 0.80                               | 0.030             |                                    |                   |                                    |                   |                         |                                                                           |                   | Immune response                                                                                        |
| <i>Serpinc1</i> | P32261     | Antithrombin-III                                                        |                                       |                   |                                    |                   |                                    |                   |                                    |                   |                         | 0.85                                                                      | 0.032             | Complement and coagulation<br>cascades                                                                 |
| <i>APOA1</i>    | Q00623     | Apolipoprotein A-I                                                      |                                       |                   | 0.88                               | 0.033             |                                    |                   |                                    |                   |                         | 0.87                                                                      | 0.041             | Fat digestion/absorption                                                                               |
| <i>Apob</i>     | E9Q414     | Apolipoprotein B-100                                                    |                                       |                   |                                    |                   |                                    |                   |                                    |                   |                         | 1.43                                                                      | 0.003             | Cholesterol homeostasis; Fat<br>digestion/absorption                                                   |
| <i>Apoc1</i>    | P34928     | Apolipoprotein C-I                                                      |                                       |                   |                                    |                   |                                    |                   |                                    |                   |                         | 0.64                                                                      | 0.041             | Lipid transport/metabolism                                                                             |
| <i>Apod</i>     | P51910     | Apolipoprotein D                                                        |                                       |                   |                                    |                   | 1.15                               | 0.045             |                                    |                   |                         | 1.19                                                                      | 0.044             | Aging; Brain development                                                                               |
| <i>Apom</i>     | Q9Z1R3     | Apolipoprotein M                                                        |                                       |                   | 0.88                               | 0.008             | 1.15                               | 0.031             |                                    |                   | 0.021                   | 1.28                                                                      | 0.002             | Cholesterol transport                                                                                  |
| <i>Bpgm</i>     | P15327     | Bisphosphoglycerate<br>mutase                                           |                                       |                   |                                    |                   |                                    |                   |                                    |                   |                         | 0.30                                                                      | 0.010             | Erythrocyte development;<br>Glycolysis                                                                 |
| <i>Clu</i>      | Q06890     | Clusterin                                                               |                                       |                   |                                    |                   |                                    |                   |                                    |                   |                         | 1.14                                                                      | 0.047             | Chaperone-mediated protein<br>folding; immune complex<br>clearance; inhibits amyloid<br>formation      |
| <i>F13b</i>     | Q07968     | Coagulation factor XIII B<br>chain                                      |                                       |                   |                                    |                   |                                    |                   | 0.90                               | 0.046             |                         | 0.70                                                                      | 0.011             | Blood coagulation; fibrin-<br>stabilizing factor; negative regul.<br>of cell protein catabolic process |
| <i>C9</i>       | A0A024R035 | Complement component C9                                                 | 1.13                                  | 0.011             | 1.16                               | 0.007             |                                    |                   |                                    |                   | 0.024                   |                                                                           |                   | Complement/coagulation<br>cascades                                                                     |
| <i>Cfh</i>      | E9Q8I0     | Complement factor H                                                     |                                       |                   |                                    |                   |                                    |                   |                                    |                   |                         | 1.24                                                                      | 2E-04             | Complement/coagulation<br>cascades                                                                     |
| <i>AI182371</i> | A2AS37     | Expressed sequence<br>AI182371                                          |                                       |                   |                                    |                   |                                    |                   |                                    |                   |                         | 1.23                                                                      | 0.047             | Complement activation,<br>inflammatory response                                                        |
| <i>FETUB</i>    | Q9QXC1     | Fetuin-B                                                                | 0.76                                  | 0.013             |                                    |                   |                                    |                   |                                    |                   |                         | 1.18                                                                      | 0.005             | Egg fertilization; Sperm binding;<br>Inhibits Cys-endopeptidase<br>activity                            |
| <i>Blvrb</i>    | Q923D2     | Flavin reductase (NADPH)                                                |                                       |                   |                                    |                   |                                    |                   |                                    |                   |                         | 0.44                                                                      | 0.042             | Heme catabolic process                                                                                 |
| <i>Aldoa</i>    | A6ZI44     | Fructose-bisphosphate<br>aldolaseA                                      |                                       |                   |                                    |                   |                                    |                   |                                    |                   |                         | 0.45                                                                      | 0.004             | ATP biosynthetic process                                                                               |

|            |            |                                              |      |       |      |       |      |       |       |       |        |      |       |                                       |
|------------|------------|----------------------------------------------|------|-------|------|-------|------|-------|-------|-------|--------|------|-------|---------------------------------------|
| GPX3       | A0A087X1J7 | Glutathione peroxidase 3                     |      |       | 0.78 | 0.029 | 1.77 | 5E-05 |       |       | 0.0014 |      |       | Cellular response to oxidative stress |
| Hp         | Q61646     | Haptoglobin                                  |      |       | 0.83 | 0.022 |      |       |       |       |        | 4.50 | 0.037 | Acute phase response                  |
| Hpx        | Q91X72     | Hemopexin                                    |      |       |      |       |      |       |       |       |        | 1.18 | 0.002 | Cellular iron ion homeostasis         |
| Hgfac      | Q9R098     | Hepatocyte growth factor activator           |      |       |      |       |      |       |       |       |        | 0.79 | 0.008 | Serine-type endopeptidase activity    |
| Hrg        | Q9ESB3     | Histidine-rich glycoprotein                  |      |       |      |       |      |       |       |       |        | 1.17 | 0.005 | Angiogenesis, Fibrinolysis            |
| Igha       | A0A0A6YXW6 | Ig alpha chain C region                      |      |       |      |       |      |       |       |       |        | 2.92 | 4E-06 | Immune response                       |
| Ighg1      | P01868     | Ig gamma-1 chain C region secreted form      |      |       |      |       |      |       |       |       |        | 1.64 | 0.022 | Immune response                       |
| Ighg1      | P01869     | Ig gamma-1 chain C region secreted form      |      |       |      |       |      |       |       |       |        | 2.31 | 2E-04 | Immune response                       |
| Ighg3      | P03987     | Ig gamma-3 chain C region                    |      |       |      |       |      | 1.30  | 0.015 |       |        | 0.32 | 1E-04 | Immune response                       |
| Ighv3-6    | P18531     | Ig heavy chain V region 3-6                  |      |       |      |       |      |       |       |       |        | 1.65 | 0.033 | Immune response                       |
| Ighv7-1    | P01790     | Ig heavy chain V region M511                 |      |       |      |       |      |       |       |       |        | 2.14 | 0.013 | Immune response                       |
| N/A        | P01638     | Ig kappa chain V-V region L6                 |      |       |      |       |      |       |       |       |        | 1.58 | 0.001 | Immune response                       |
| Gm5571     | P01639     | Ig kappa chain V-V region MOPC 41            |      |       |      |       |      |       |       |       |        | 1.58 | 0.014 | Immune response                       |
| V2-17      | Q5NV90     | V2-17 protein                                |      |       |      |       | 1.23 | 0.042 |       |       |        |      |       | Immune response                       |
| N/A        | P01843     | Ig lambda-1 chain C region                   |      |       |      |       |      |       |       |       |        | 1.52 | 0.010 | Immune response                       |
| Iglv1      | P01723     | Ig lambda-1 chain V region                   |      |       |      |       |      |       |       |       |        | 2.64 | 0.002 | Immune response                       |
| Ighm       | A0A075B6A0 | Ig mu chain C region                         |      |       |      |       |      |       |       |       |        | 1.59 | 0.002 | Immune response                       |
| Ighv10-1   | A0A0B4J1J6 | Ig heavy variable 10-1                       |      |       |      |       |      |       |       |       |        | 1.76 | 0.026 | Immune response                       |
| Ighv1-76   | A0A0G2JFE9 | Ig heavy variable 1-76                       |      |       |      |       |      |       |       |       |        | 1.61 | 0.025 | Immune response                       |
| Igj        | P01592     | Immunoglobulin J chain                       |      |       |      |       |      |       |       |       |        | 2.99 | 1E-05 | Immune response                       |
| Igkv19-93  | A0A0G2JFZ3 | Ig kappa variable 19-93                      |      |       |      |       |      |       |       |       |        | 2.26 | 0.019 | Immune response                       |
| Igkv17-127 | A0A0G2JDN5 | Ig kappa variable 17-127                     |      |       |      |       |      |       |       |       |        | 2.85 | 0.006 | Immune response                       |
| Igkv4-63   | A0A0G2JFU6 | Ig kappa variable 4-63                       |      |       |      |       |      |       |       |       |        | 1.89 | 0.040 | Immune response                       |
| Igkv8-28   | A0A0G2JE47 | Ig kappa variable 8-28                       |      |       |      |       |      |       |       |       |        | 3.53 | 0.001 | Immune response                       |
| Ica        | Q9DBD0     | Inhibitor of carbonic anhydrase              |      |       |      |       |      |       |       |       |        | 0.89 | 0.004 | Enzyme inhibitor activity             |
| Itih1      | Q61702     | Inter-alpha-trypsin inhibitor heavy chain H1 |      |       |      |       |      |       |       |       |        | 0.90 | 0.002 | Endopeptidase inhibitor               |
| ITIH3      | Q06033     | Inter-alpha-trypsin inhibitor heavy chain H3 | 1.30 | 0.001 | 1.22 | 0.023 |      |       | 1.45  | 7E-05 | 0.0008 |      |       | Endopeptidase inhibitor               |

|                  |        |                                            |      |       |      |       |      |       |      |       |       |      |       |                                                                |
|------------------|--------|--------------------------------------------|------|-------|------|-------|------|-------|------|-------|-------|------|-------|----------------------------------------------------------------|
| <i>Lifr</i>      | P42703 | Leukemia inhibitory factor receptor        |      |       |      |       |      |       |      |       |       | 0.72 | 3E-04 | Cytokine-mediated signaling                                    |
| <i>Ldha</i>      | P06151 | L-lactate dehydro-genase A chain           |      |       |      |       |      |       |      |       |       | 0.48 | 4E-04 | Cellular response to extracellular stimulus                    |
| <i>Mbl1</i>      | P39039 | Mannose-binding protein A                  |      |       |      |       |      |       |      |       |       | 0.83 | 0.045 | Complement/coagulation cascades; Phagosome                     |
| <i>Mug1</i>      | P28665 | Murinoglobulin-1                           |      |       |      |       |      |       |      |       |       | 0.77 | 0.032 | Embryo implantation                                            |
| <i>PGLYRP2</i>   | Q96PD5 | N-acetylmuramoyl-L-alanine amidase         | 1.08 | 0.013 | 1.09 | 0.021 |      |       |      |       | 0.047 |      |       | Antimicrobial humoral response                                 |
| <i>Lcat</i>      | P16301 | Phosphatidylcholine-sterol acyltransferase |      |       |      |       |      |       |      |       |       | 1.41 | 0.036 | Plasma lipoprotein metabolism                                  |
| <i>Klkb1</i>     | P26262 | Plasma kallikrein                          |      |       |      |       |      |       |      |       |       | 0.83 | 0.015 | Complement/coagulation cascades                                |
| <i>PLG</i>       | P00747 | Plasminogen                                | 0.95 | 0.048 |      |       |      |       |      |       |       |      |       | Blood coagulation                                              |
| <i>CFP</i>       | P27918 | Properdin                                  | 1.32 | 0.013 | 1.34 | 0.034 |      |       |      |       |       |      |       | Complement activation, immune response                         |
| <i>Ambp</i>      | Q07456 | Alpha-1-microglobulin                      |      |       |      |       |      |       |      |       |       | 1.15 | 0.011 | Protein catabolic process; Inhibits trypsin, plasmin, elastase |
| <i>SERPINA10</i> | Q9UK55 | Protein Z-dependent protease inhibitor     |      |       |      |       | 0.78 | 0.026 | 0.78 | 0.021 | 0.034 |      |       | Blood coagulation                                              |
| <i>F2</i>        | Q8R121 | Prothrombin                                |      |       |      |       |      |       |      |       |       | 1.11 | 0.022 | Complement/coagulation cascades                                |
| <i>RBP4</i>      | P02753 | Retinol-binding protein 4                  | 0.88 | 0.002 | 0.89 | 0.016 |      |       | 0.86 | 0.009 | 0.006 |      |       | Cardiac muscle tissue development                              |
| <i>Alb</i>       | P07724 | Serum albumin                              |      |       |      |       |      |       |      |       |       | 0.88 | 0.036 | Cellular response to starvation                                |
| <i>Pon1</i>      | P52430 | Serum paraoxonase 1                        | 0.62 | 4E-16 | 0.63 | 6E-12 |      |       | 0.60 | 5E-11 | 3E-15 | 0.02 | 3E-19 | Homocysteine thiolactone detoxication                          |
| <i>Ttr</i>       | P02766 | Transthyretin                              | 0.84 | 0.007 | 0.83 | 0.012 |      |       |      |       | 0.022 | 1.28 | 0.037 | Retinol metabolic process, thyroid hormone transport           |
| <i>V2-6</i>      | A2MYD5 | V2-6 protein                               |      |       | 1.27 | 0.038 |      |       |      |       |       |      |       | Immune response                                                |
| <i>VTN</i>       | P04004 | Vitronectin                                |      |       |      |       | 0.91 | 0.007 |      |       |       |      |       | Collagen binding, complement/cogulation cascades               |

<sup>a</sup> Proteins affected by *PON1* genotype only in humans or mice are highlighted in yellow or bright green, respectively. Data for proteins affected by *PON1* genotype in both humans and mice are shaded in green accent light.
